# Supplementary material for: Industrial basalt fiber-loaded CuNi for the continuous synthesis of DMC from CO2 and methanol
Source: Royal Society of Chemistry journal article supplement (doi:10.1039/d3nj00130j), 2023-01-01
Supplement: d3nj00130j1.pdf [file d3nj00130j1.pdf]

1

## Supplementary information

2 **Industrial basalt fiber loaded CuNi for continuous synthesis of DMC**

3 **from CO<sub>2</sub> and methanol**

4 **Li Luo<sup>1</sup> · Yongdong Chen<sup>1\*</sup> · Jie Deng<sup>1</sup> · Yingying Wang<sup>2</sup> · Qiang Tang<sup>1</sup> · Mengyue Hou<sup>1</sup> ·**  
5 **Zhiyue Zhang<sup>1</sup> and Shijian Lu<sup>3, 4</sup>**

6 <sup>1</sup>College of Chemistry and Chemical Engineering, Southwest Petroleum University, 7  
7 Chengdu 610500, People's Republic of China.

8 <sup>2</sup>Key Laboratory of Optoelectronic Chemical Materials and Devices (Ministry of Education),  
9 Jiangnan University, Wuhan, China.

10 <sup>3</sup>Jiangsu Key Laboratory of Coal-based Greenhouse Gas Control and Utilization, China  
11 University of Mining and Technology, Xuzhou, Jiangsu 221008, China.

12 <sup>4</sup>Carbon Neutrality Institute, China University of Mining and Technology, Xuzhou, Jiangsu  
13 221008, China

14 \*Corresponding author. E-mail: [yongdongchen@swpu.edu.cn](mailto:yongdongchen@swpu.edu.cn)

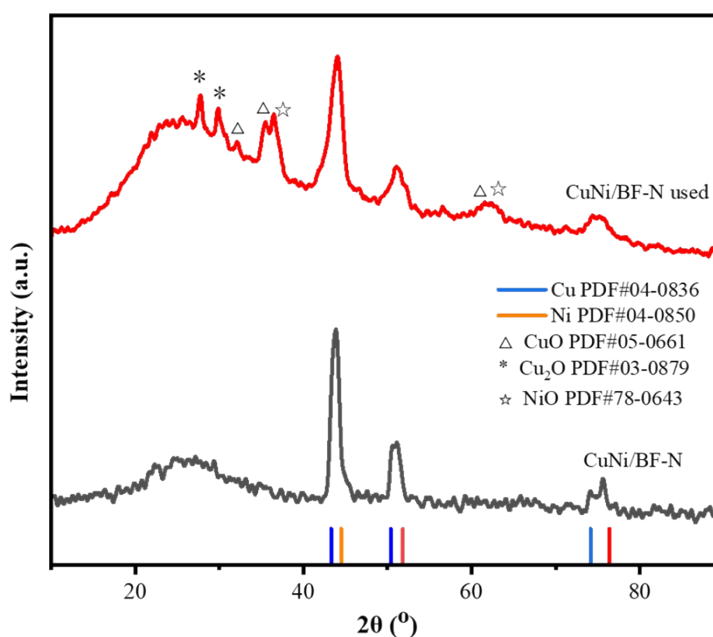

15

16

Fig S1. XRD patterns of fresh catalyst and used catalyst.

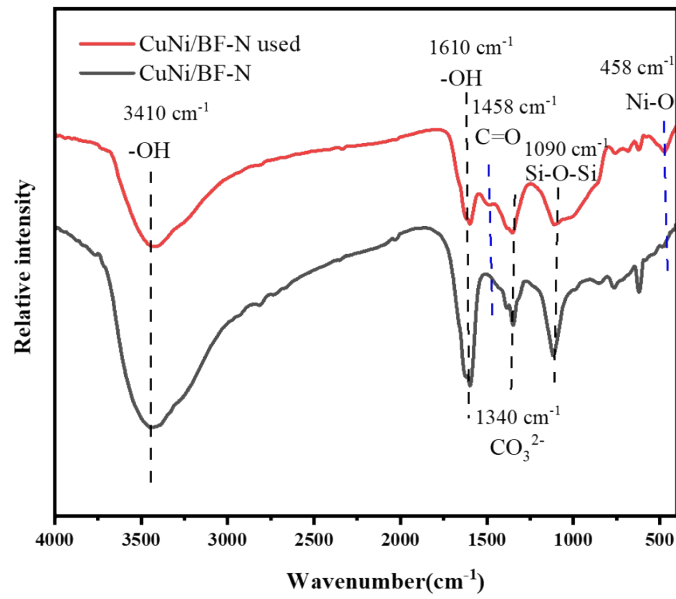

17

18

Fig S2 FTIR patterns of fresh catalyst and used catalyst.

19 Table S1 XPS fitting data for all catalysts.

| Catalysts | Element (Atomic%) |      |      |
|-----------|-------------------|------|------|
|           | Cu                | Ni   | Al   |
| CuNi/BF-U | 19.6              | 27.5 | 52.9 |
| CuNi/BF-H | 23.0              | 32.7 | 44.3 |
| CuNi/BF-N | 33.7              | 36.1 | 30.1 |

20

21 Table S2 ICP test results of all catalysts

| Catalysts | Element (Atomic%) |     |      |     |     |     |      |     |     |     |
|-----------|-------------------|-----|------|-----|-----|-----|------|-----|-----|-----|
|           | Al                | Ca  | Si   | Fe  | K   | Mg  | Na   | Ti  | Cu  | Ni  |
| CuNi/BF-U | 15.1              | 7.4 | 35.5 | 6.5 | 1.0 | 8.6 | 11.8 | 1.1 | 6.6 | 6.4 |
| CuNi/BF-H | 15.5              | 7.3 | 36.9 | 6.0 | 1.1 | 8.3 | 8.7  | 1.1 | 7.9 | 7.3 |
| CuNi/BF-N | 15.0              | 7.2 | 30.5 | 6.5 | 1.0 | 8.1 | 14.5 | 1.1 | 8.4 | 7.7 |

22
